# Supplementary material
Source: MDPI journal article supplement (https://www.mdpi.com/2079-6412/12/2/253)
Supplement: s1 [file s1]

# Novel Hydrophobic Nanostructured Antibacterial Coatings for Metallic Surface Protection

Cristina Lavinia Nistor <sup>1</sup>, Catalin Ionut Mihaescu <sup>1</sup>, Daniela Bala <sup>2</sup>, Ioana Catalina Gifu <sup>1</sup>, Claudia Mihaela Ninciuleanu <sup>1</sup>, Sabina Georgiana Burlacu <sup>1,\*</sup>, Cristian Petcu <sup>1,\*</sup>, Mariana-Gratiela Vladu <sup>3</sup>, Adi Ghebaur <sup>4</sup>, Lenuta Stroea <sup>5</sup> and Ludmila Otilia Cinteza <sup>2</sup>

<sup>1</sup> Polymers Department, National Institute for Research and Development in Chemistry and Petrochemistry-ICECHIM, 060021 Bucharest, Romania; cristina.nistor@icechim-pd.ro (C.L.N.); catalin.mihaescu@icechim-pd.ro (C.I.M.); catalina.gifu@icechim-pd.ro (I.C.G.); claudia.ninciuleanu@icechim-pd.ro (C.M.N.)

<sup>2</sup> Physical Chemistry Department, University of Bucharest, 030018 Bucharest, Romania; dbala@gw-chimie.math.unibuc.ro (D.B.); ocinteza@gw-chimie.math.unibuc.ro (L.O.C.)

<sup>3</sup> Department of Biotechnology, National Institute for Chemical Pharmaceutical Research and Development-ICCF, 031299 Bucharest, Romania; mari29ani@yahoo.com

<sup>4</sup> Department of Bioresources and Polymer Science, Faculty of Applied Chemistry and Materials Science, University Politehnica of Bucharest, 011061 Bucharest, Romania; adi.ghebaur@upb.ro

<sup>5</sup> Polyaddition and Photochemistry Department, Petru Poni Institute of Macromolecular Chemistry, 700487 Iasi, Romania; elenah@icmpp.ro

\* Correspondence: sabina.nitu@icechim-pd.ro (S.G.B.); cpetcu@icf.ro (C.P.)

**Citation:** Nistor, C.L.; Mihaescu, C.I.; Bala, D.; Gifu, I.C.; Ninciuleanu, C.M.; Burlacu, S.G.; Petcu, C.; Vladu, M.-G.; Ghebaur, A.; Stroea, L.; et al. Novel Hydrophobic Nanostructured Antibacterial Coatings for Metallic Surface Protection. *Coatings* **2022**, *12*, 253. <https://doi.org/10.3390/coatings12020253>

Academic Editor: Judit Telegdi

Received: 21 December 2021

Accepted: 11 February 2022

Published: 15 February 2022

**Publisher's Note:** MDPI stays neutral with regard to jurisdictional claims in published maps and institutional affiliations.

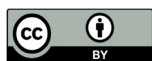

**Copyright:** © 2022 by the authors. Licensee MDPI, Basel, Switzerland. This article is an open access article distributed under the terms and conditions of the Creative Commons Attribution (CC BY) license (<https://creativecommons.org/licenses/by/4.0/>).

**Table S1.** LSV and corrosion parameters (from Tafel) for bare and coated copper in 3.5% NaCl.

| Materials     | $R_p$<br>( $\Omega$ ) | $-E_{corr}$<br>(mV) | $I_{corr}$<br>( $\mu A/cm^2$ ) | Corrosion Rate<br>(mm/year) |
|---------------|-----------------------|---------------------|--------------------------------|-----------------------------|
| Cu_Bare       | 844.5                 | 332                 | 21.52                          | 0.2497                      |
| Cu_Ao (I)     | 2775                  | 320                 | 7.946                          | 0.09219                     |
| Cu_AOAg (I)   | 2998                  | 379                 | 17.71                          | 0.2054                      |
| Cu_AOZnO (I)  | 2968                  | 304                 | 6.089                          | 0.07064                     |
| Cu_Ao (II)    | 2274                  | 329                 | 7.359                          | 0.08538                     |
| Cu_AOAg (II)  | 4922                  | 280                 | 5.584                          | 0.06479                     |
| Cu_AOZnO (II) | 4378                  | 287                 | 4.628                          | 0.05369                     |

**Table S2.** LSV and corrosion parameters (from Tafel) for bare and coated brass in 3.5% NaCl.

| Materials        | $R_p$<br>( $k\Omega$ ) | $-E_{corr}$<br>(mV) | $I_{corr}$<br>( $\mu A/cm^2$ ) | Corrosion Rate<br>(mm/year) |
|------------------|------------------------|---------------------|--------------------------------|-----------------------------|
| Brass_Bare       | 7431                   | 287                 | 8.713                          | 0.1752                      |
| Brass_Ao (I)     | 1472                   | 201                 | 14.62                          | 0.1044                      |
| Brass_AOAg (I)   | 3362                   | 303                 | 5.948                          | 0.07129                     |
| Brass_AOZnO (I)  | 5286                   | 283                 | 3.418                          | 0.04552                     |
| Brass_Ao (II)    | 5506                   | 273                 | 6.537                          | 0.07835                     |
| Brass_AOAg (II)  | 10520                  | 272                 | 3.013                          | 0.03611                     |
| Brass_AOZnO (II) | 9985                   | 275                 | 3.797                          | 0.04097                     |

**Table S3.** LSV and corrosion parameters (from Tafel) for bare and coated mild steel in 3.5% NaCl.

| Materials     | $R_p$<br>( $k\Omega$ ) | $-E_{corr}$<br>(mV) | $I_{corr}$<br>( $\mu A/cm^2$ ) | Corrosion Rate<br>(mm/year) |
|---------------|------------------------|---------------------|--------------------------------|-----------------------------|
| Fe_Bare       | 1177                   | 832                 | 74.85                          | 0.8703                      |
| Fe_Ao         | 1813                   | 902                 | 36.311                         | 0.4222                      |
| Fe_AOAg       | 1281                   | 976                 | 70.34                          | 0.8178                      |
| Fe_AOZnO      | 1436                   | 958                 | 58.72                          | 0.6827                      |
| Fe_Ao (II)    | 2400                   | 902                 | 31.95                          | 0.3715                      |
| Fe_AOAg (II)  | 2120                   | 958                 | 65.47                          | 0.7612                      |
| Fe_AOZnO (II) | 2486                   | 933                 | 39.89                          | 0.4638                      |

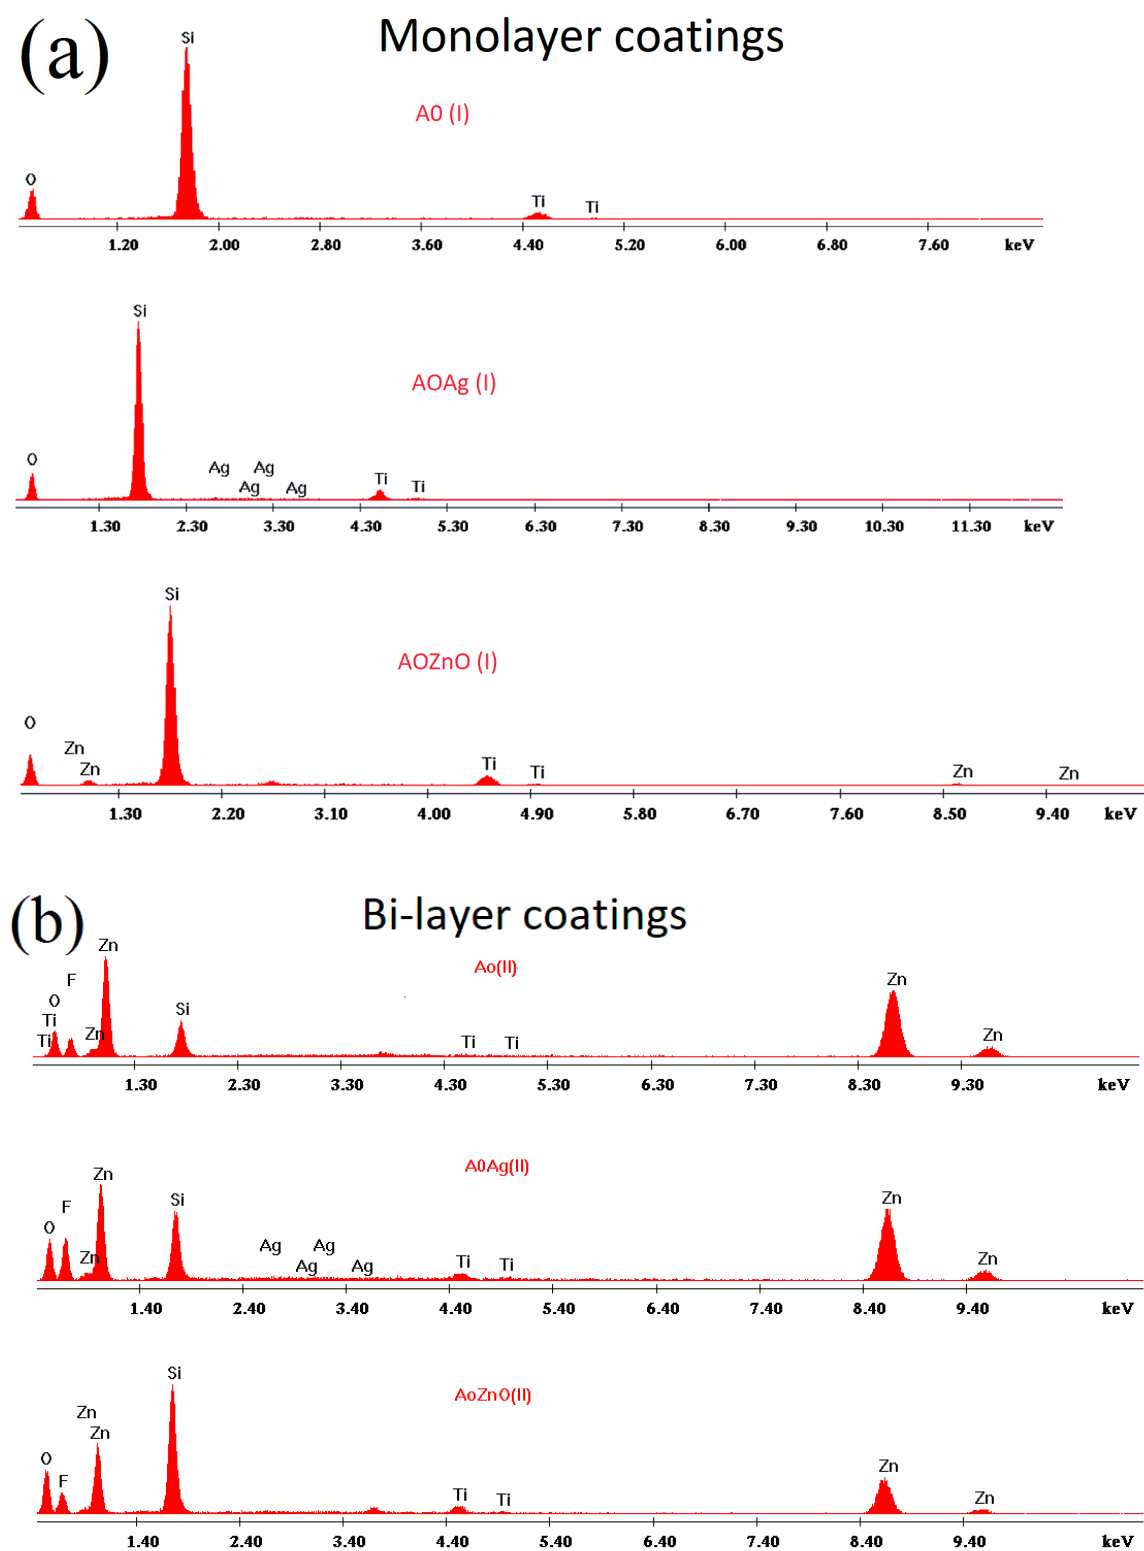

Figure S1. EDS spectra of the (a) monolayer and (b) bilayer coatings.

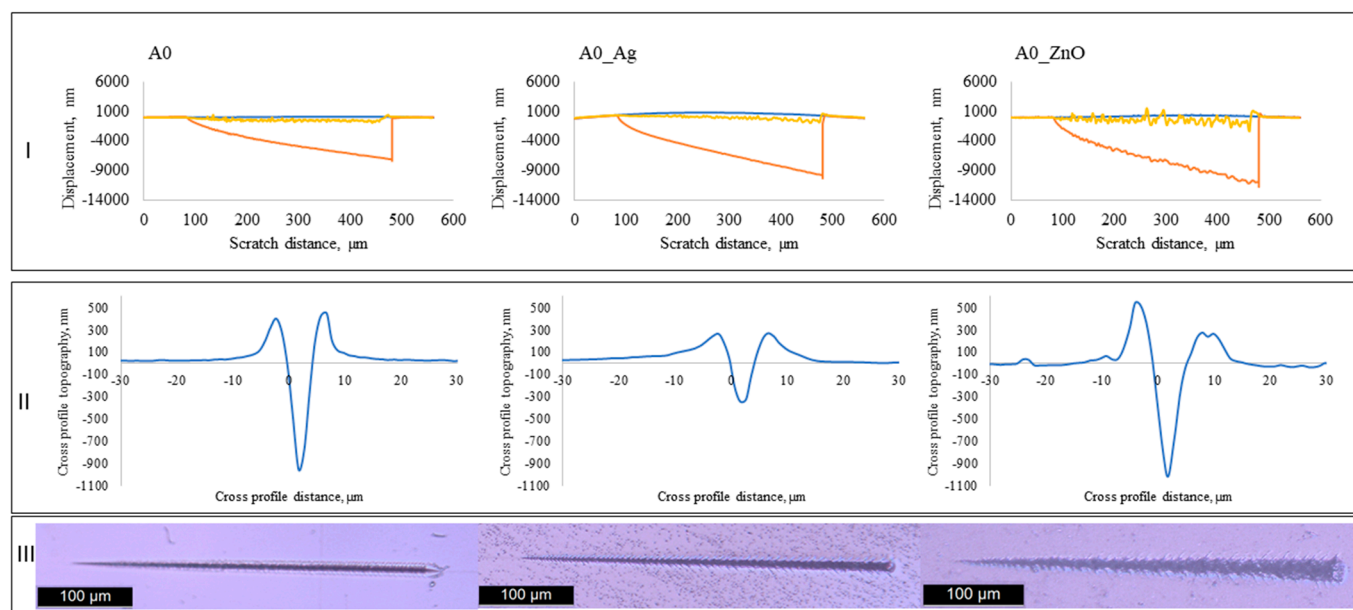

**Figure S2.** Representative curves for: panel I: scratch tests (blue line—surface pre-scan, orange line—scratch profile, yellow line—post-scratch profile); panel II: cross-section profiles obtained at 20 mN load and panel III: optical microscopy images of the scratch path, objective 10 $\times$ .

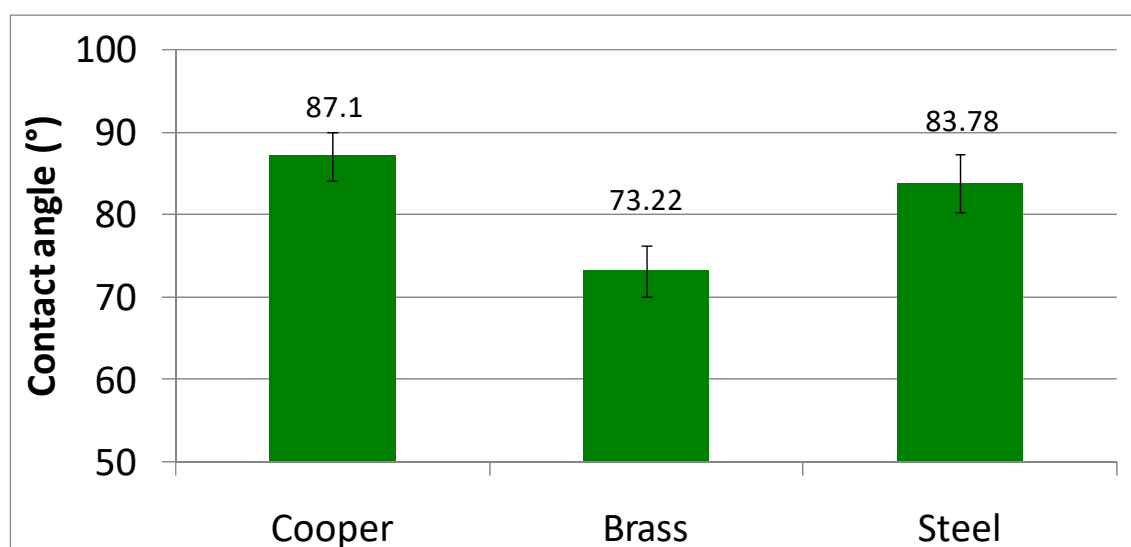

**Figure S3.** The average contact angle values measured for the uncoated metallic coupons (bare metallic surfaces).

## A0 coated on brass

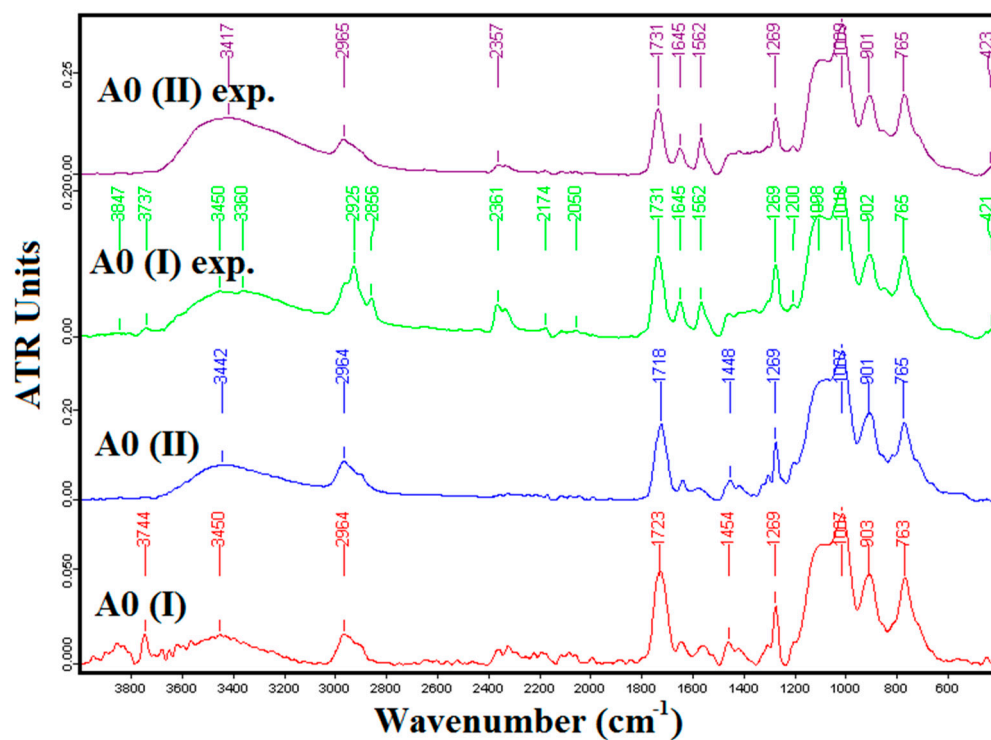

(a)

## A0 coated on copper

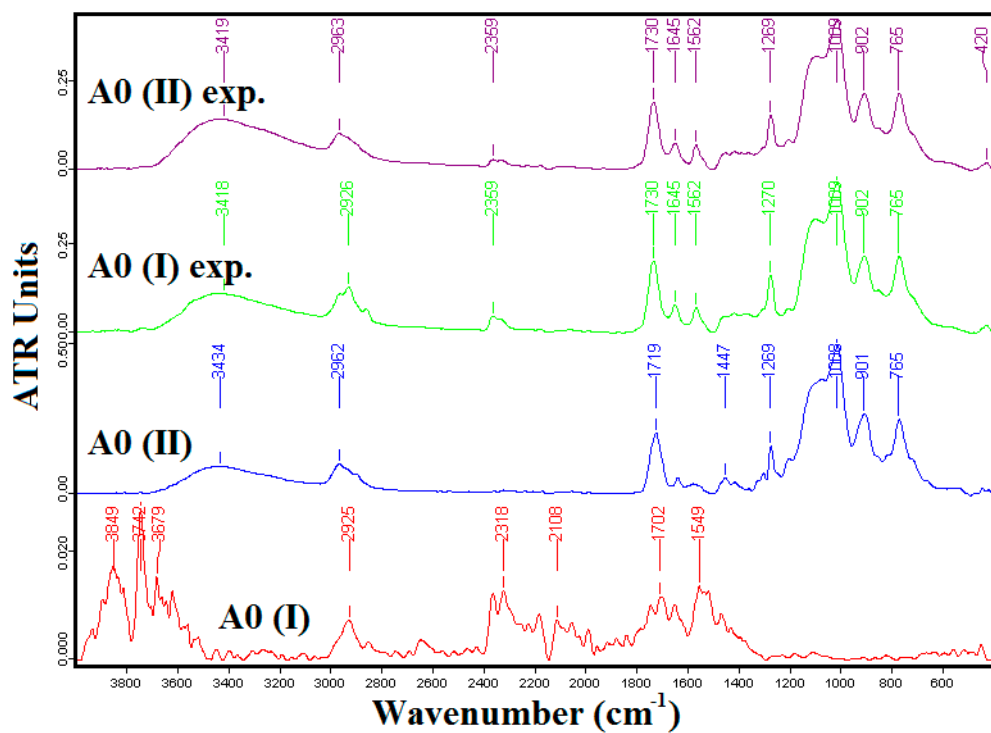

(a')

## A0 coated on mild steel

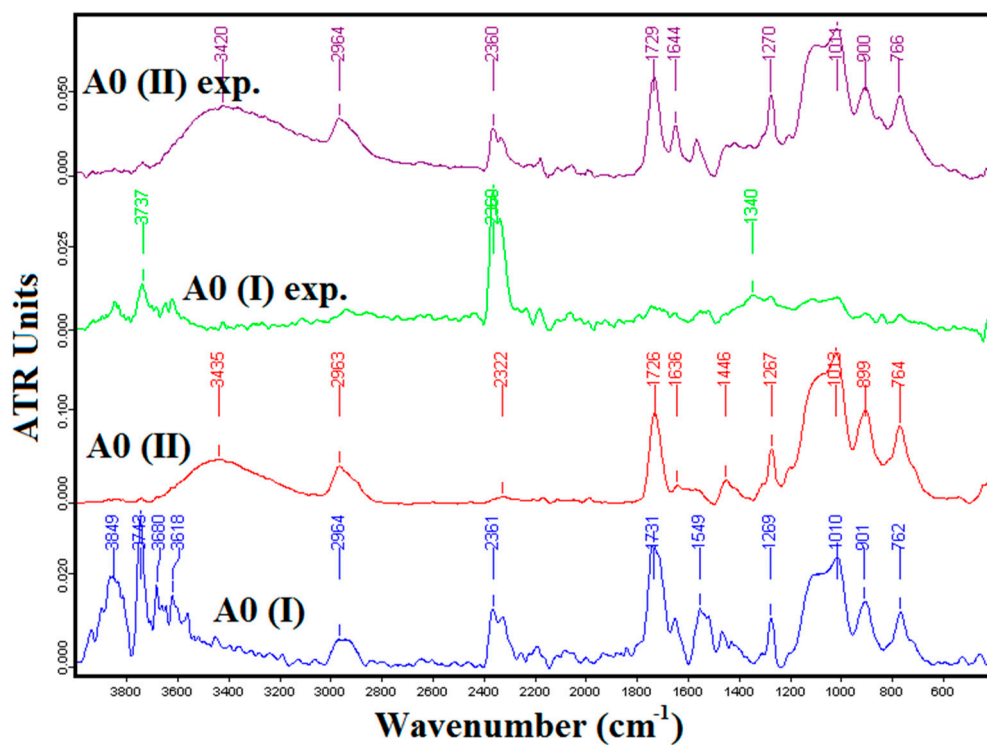

(a'')

## AOAg coated on brass

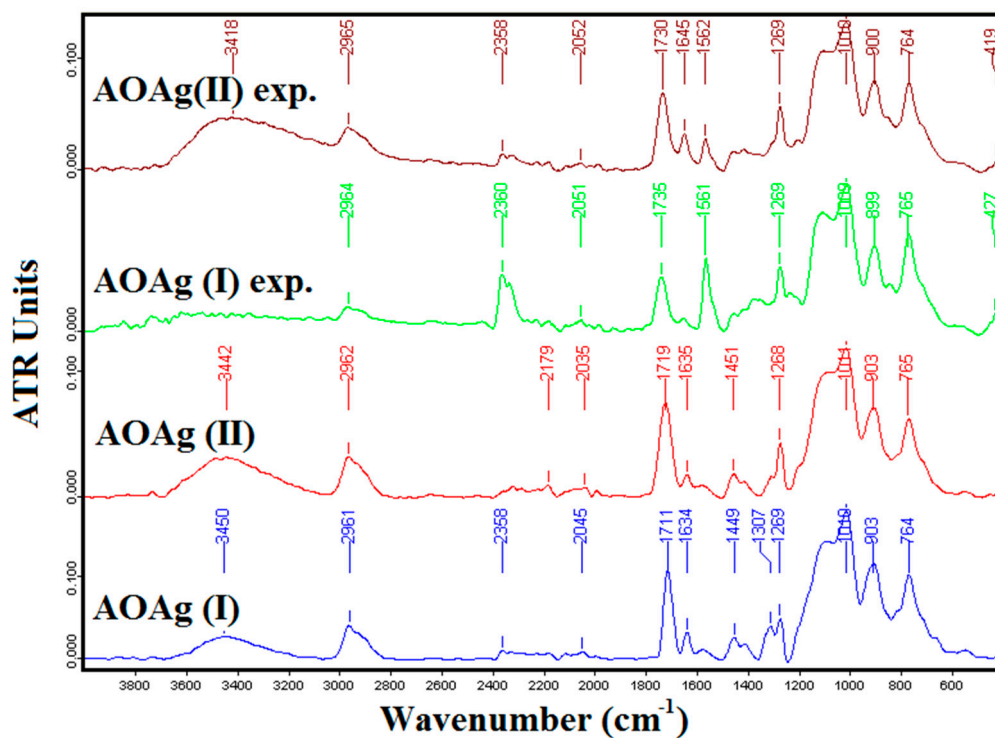

(b)

## AOAg coated on copper

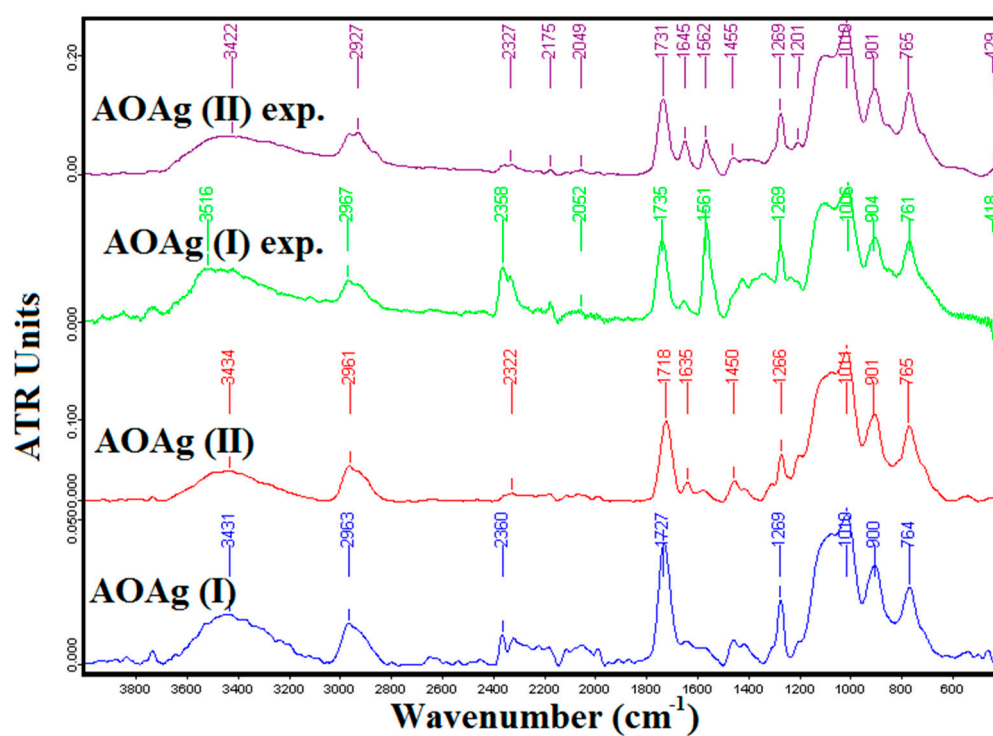

(b')

## AOAg coated on mild steel

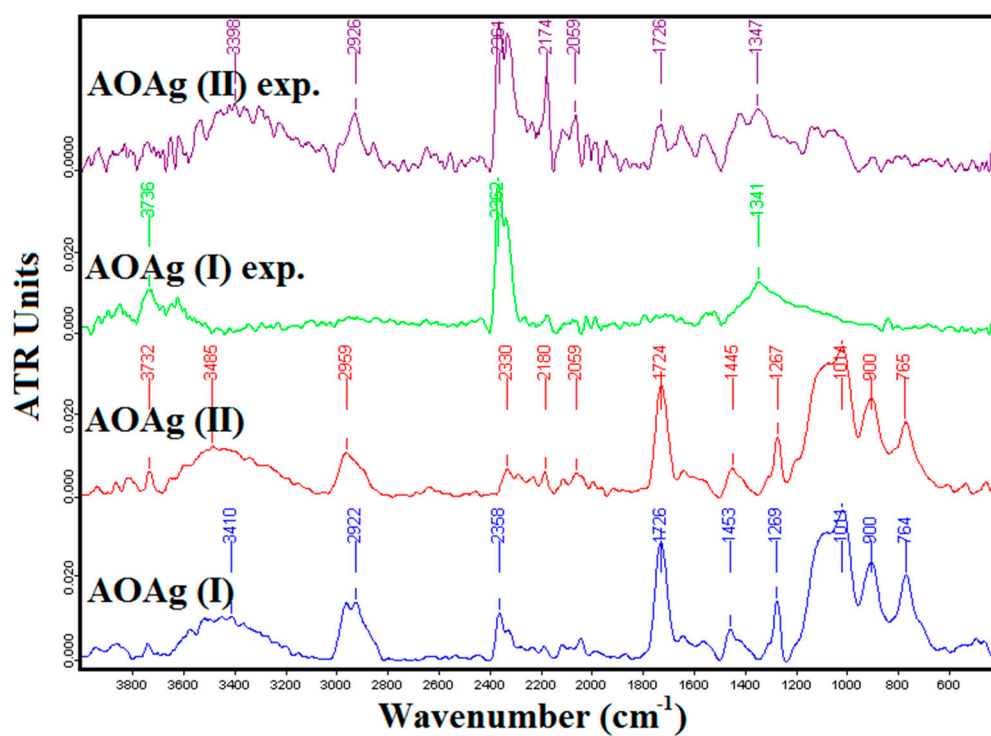

(b'')

## AOZnO coated on brass

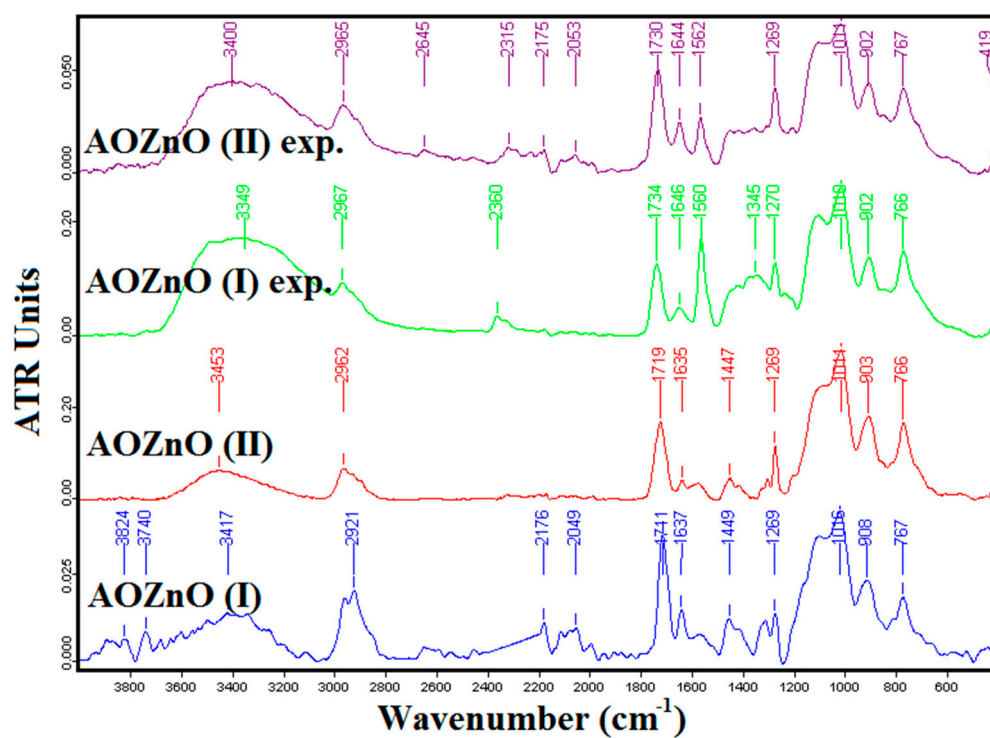

(c)

## AOZnO coated on copper

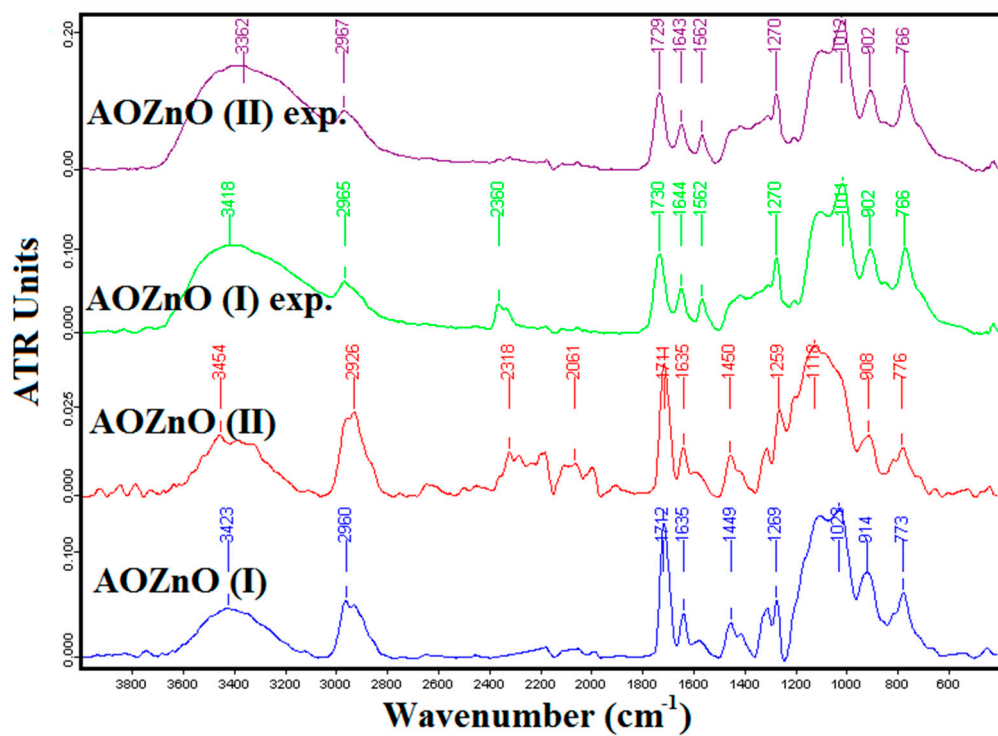

(c')



## AOZnO coated on mild steel

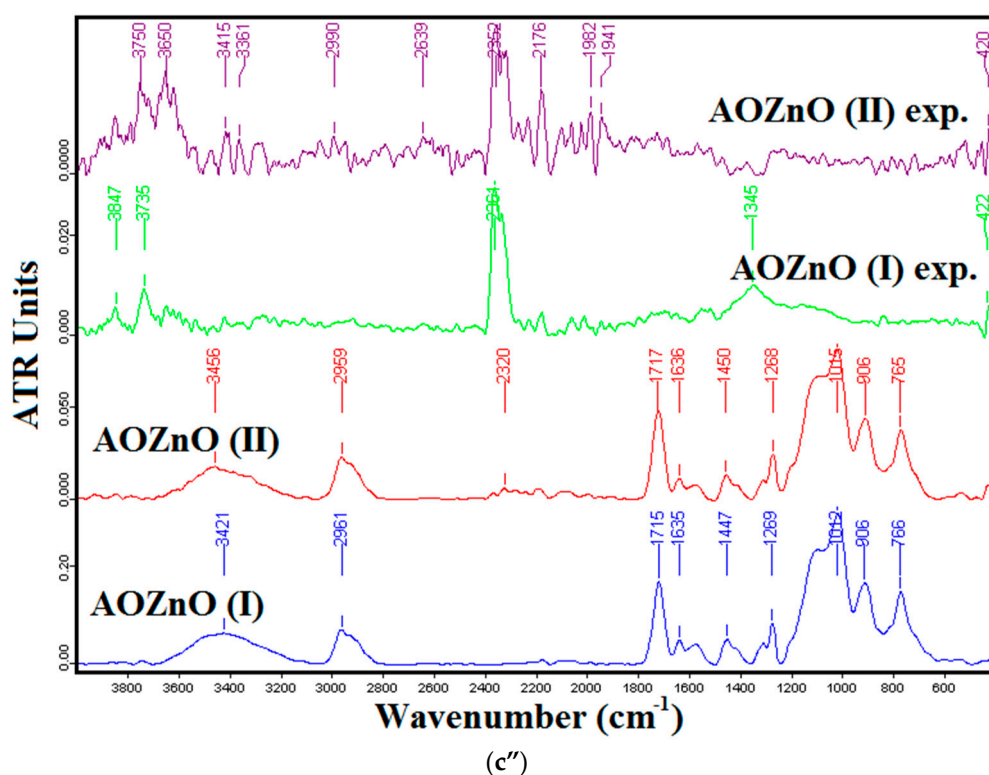

**Figure S4.** FT-IR spectra recorded before and after exposure to a pollutant ( $\text{NO}_2$ ) for the mono-(I) and bilayer(II) coatings: A0 deposited on brass (a), copper (a') and mild steel plates (a''); AOAg deposited on brass (b), copper (b') and mild steel plates (b''); AOZnO deposited on brass (c), copper (c') and mild steel plates (c'').

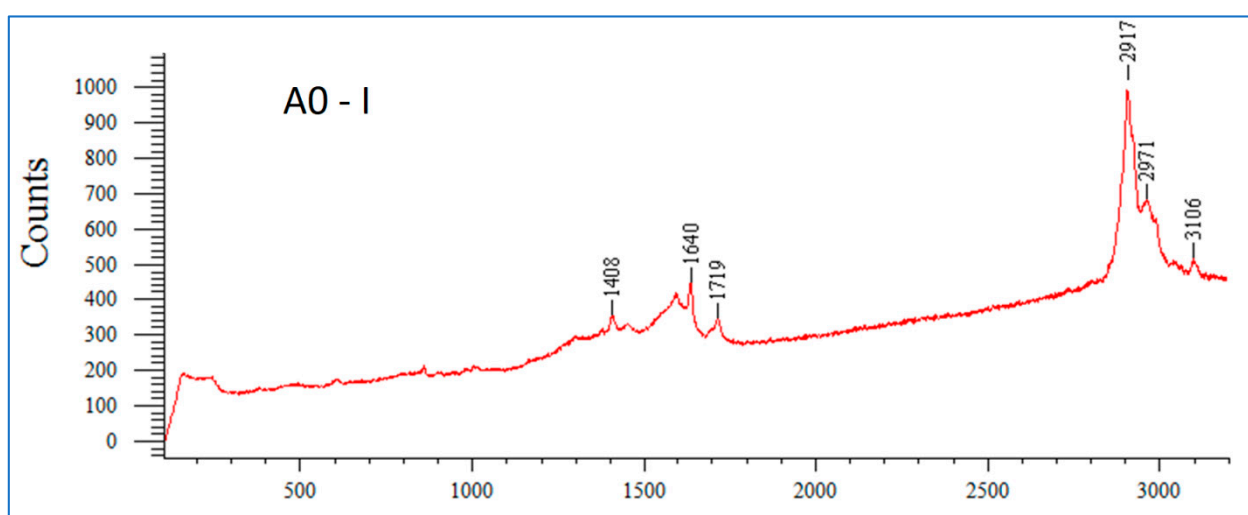

**Figure S5.** The Raman spectrum of the reference coating A0-I.
